# Supplementary material for: Characteristics of the Gut Microbiome of Healthy Young Male Soldiers in South Korea: The Effects of Smoking
Source: PubMed Central journal article supplement — Gut Liver. 2020 May 13;15(2):243–52. doi: 10.5009/gnl19354 (PMC7960973; doi:10.5009/gnl19354), 2020-05-13
Supplement: gnl-15-2-243-supple.pdf [file gnl-15-2-243-supple.pdf]

**Supplementary Table 1.** Core Microbiome Taxonomy (Common Species Found in >90% of the Subjects)

| Phylum                | Species                                      | Relative abundance, % |
|-----------------------|----------------------------------------------|-----------------------|
| <i>Actinobacteria</i> | <i>Actinomyces odontolyticus</i>             | 0.01                  |
| <i>Actinobacteria</i> | <i>Bifidobacterium adolescentis</i> group    | 5.76                  |
| <i>Actinobacteria</i> | <i>Bifidobacterium catenulatum</i> group     | 2.12                  |
| <i>Actinobacteria</i> | <i>Bifidobacterium longum</i> group          | 2.55                  |
| <i>Actinobacteria</i> | <i>Collinsella aerofaciens</i> group         | 2.45                  |
| <i>Actinobacteria</i> | KE952139_s                                   | 0.03                  |
| <i>Bacteroidetes</i>  | <i>Bacteroides dorei</i>                     | 0.43                  |
| <i>Bacteroidetes</i>  | <i>Bacteroides ovatus</i> group              | 0.46                  |
| <i>Bacteroidetes</i>  | <i>Bacteroides uniformis</i>                 | 0.65                  |
| <i>Bacteroidetes</i>  | <i>Bacteroides vulgatus</i>                  | 1.54                  |
| <i>Firmicutes</i>     | <i>Agathobacter rectalis</i>                 | 1.53                  |
| <i>Firmicutes</i>     | <i>Agathobaculum butyriciproducens</i> group | 0.39                  |
| <i>Firmicutes</i>     | <i>Anaerostipes hadrus</i> group             | 4.29                  |
| <i>Firmicutes</i>     | <i>Blautia faecis</i>                        | 0.75                  |
| <i>Firmicutes</i>     | <i>Blautia hansenii</i> group                | 0.37                  |
| <i>Firmicutes</i>     | <i>Blautia luti</i>                          | 0.28                  |
| <i>Firmicutes</i>     | <i>Blautia obeum</i>                         | 0.87                  |
| <i>Firmicutes</i>     | <i>Blautia wexlerae</i>                      | 7.49                  |
| <i>Firmicutes</i>     | CCMM_s                                       | 0.83                  |
| <i>Firmicutes</i>     | <i>Clostridium celatum</i> group             | 0.90                  |
| <i>Firmicutes</i>     | <i>Coprococcus comes</i> group               | 0.71                  |
| <i>Firmicutes</i>     | <i>Dorea formicigenerans</i>                 | 0.72                  |
| <i>Firmicutes</i>     | <i>Dorea longicatena</i>                     | 2.64                  |
| <i>Firmicutes</i>     | <i>Eubacterium hallii</i>                    | 2.86                  |
| <i>Firmicutes</i>     | <i>Faecalibacterium prausnitzii</i> group    | 4.54                  |
| <i>Firmicutes</i>     | <i>Fusicatenibacter saccharivorans</i>       | 2.33                  |
| <i>Firmicutes</i>     | <i>Gemmiger formicilis</i> group             | 1.86                  |
| <i>Firmicutes</i>     | <i>Intestinibacter bartlettii</i>            | 0.91                  |
| <i>Firmicutes</i>     | LN913006_s group                             | 2.67                  |
| <i>Firmicutes</i>     | LT635539_s group                             | 0.29                  |
| <i>Firmicutes</i>     | LT907848_s                                   | 1.62                  |
| <i>Firmicutes</i>     | PAC001048_s group                            | 0.53                  |
| <i>Firmicutes</i>     | PAC001136_s                                  | 0.41                  |
| <i>Firmicutes</i>     | PAC001173_s                                  | 1.57                  |
| <i>Firmicutes</i>     | PAC001177_s                                  | 0.53                  |
| <i>Firmicutes</i>     | <i>Romboutsia timonensis</i>                 | 2.81                  |
| <i>Firmicutes</i>     | <i>Roseburia cecicola</i> group              | 0.32                  |
| <i>Firmicutes</i>     | <i>Roseburia inulinivorans</i>               | 0.37                  |
| <i>Firmicutes</i>     | <i>Ruminococcus bromii</i>                   | 1.44                  |
| <i>Firmicutes</i>     | <i>Ruminococcus faecis</i>                   | 2.12                  |
| <i>Firmicutes</i>     | <i>Ruminococcus gnavus</i>                   | 1.61                  |
| <i>Firmicutes</i>     | <i>Streptococcus parasanguinis</i> group     | 0.06                  |
| <i>Firmicutes</i>     | <i>Streptococcus pneumoniae</i> group        | 0.07                  |
| <i>Firmicutes</i>     | <i>Streptococcus salivarius</i> group        | 1.96                  |
| <i>Firmicutes</i>     | <i>Streptococcus sinensis</i> group          | 0.14                  |
| <i>Firmicutes</i>     | <i>Turicibacter sanguinis</i>                | 0.40                  |
| <i>Proteobacteria</i> | <i>Escherichia coli</i> group                | 2.33                  |
